# Supplementary material for: Crystallization and Structural Properties of Oleogel-Based Margarine
Source: MDPI journal article supplement (doi:10.3390/molecules27248952), 2022-12-15
Supplement: s1 [file s1]

## Supplementary data

**Supplementary Table S1.** Peak temperature ( $T_{pc}$ ), and enthalpy ( $\Delta H$ ) of wax oleogel-based margarine with rapid cooling rate

| Samples             | $T_{pc}$ ( $^{\circ}\text{C}$ ) | $\Delta H$ ( $\text{Jg}^{-1}$ ) |
|---------------------|---------------------------------|---------------------------------|
| 4% BW               | $46.76 \pm 0.08^a$              | $3.99 \pm 0.30^a$               |
| 6% BW               | $49.13 \pm 0.28^b$              | $4.30 \pm 0.19^b$               |
| 8% BW               | $50.63 \pm 0.34^c$              | $4.80 \pm 0.26^c$               |
| 10% BW              | $52.23 \pm 0.23^d$              | $9.51 \pm 0.54^d$               |
| Commercial margarin | $33.45 \pm 0.31^e$              | $4.03 \pm 0.30^e$               |

Values represent the average of three replicates  $\pm$  standard deviation. Different superscript letters (a-e) denote significantly difference ( $p < 0.05$ ) in the same column.

**Supplementary Table S2.** Peak temperature ( $T_{pc}$ ), and enthalpy ( $\Delta H$ ) of wax oleogel-based margarine without rapid cooling rate

| Samples | $T_{pc}$ ( $^{\circ}\text{C}$ ) | $\Delta H$ ( $\text{Jg}^{-1}$ ) |
|---------|---------------------------------|---------------------------------|
| 4% BW'  | $46.79 \pm 0.18^a$              | $4.00 \pm 0.23^a$               |
| 6% BW'  | $49.25 \pm 0.20^b$              | $4.37 \pm 0.20^b$               |
| 8% BW'  | $50.74 \pm 0.26^c$              | $4.89 \pm 0.15^c$               |
| 10% BW' | $52.27 \pm 0.17^d$              | $9.56 \pm 0.37^d$               |

Values represent the average of three replicates  $\pm$  standard deviation. Different superscript letters (a-e) denote significantly difference ( $p < 0.05$ ) in the same column.
